# Supplementary material
Source: publisher site journal article supplement (https://www.dovepress.com/get_supplementary_file.php?f=492178.docx)
Supplement: Supplementary file 1 [file get_supplementary_file.php]

Legend of supplement figures and tables.

SFigure 1. Flow chart of enrolled participants.

SFigure 2. Scatter plot considering both STAR and GOLD staging.

SFigure 3. Correlation between STAR staging and GOLD staging.

STable 1. Characteristics of participants.

STable 2. Characteristics of participants according to STAR.

STable 3. Characteristics of participants according to GOLD.

STable 4. Comparison of seeking medical attention for severe respiratory symptoms in 3 months before follow-up by severity stage in all high-risk population using HR and 95%CI.

STable 5. Comparison of seeking medical attention for severe respiratory symptoms in 3 months before follow-up by severity stage combining STAR and GOLD in COPD patients using HR and 95%CI.

STable 6. Symptoms of participants according to STAR.

STable 7. Symptoms of participants according to GOLD.

STable 8. Comparison of CAT score by severity stage in COPD patients.

STable 9. Comparison of mMRC by severity stage in COPD patients.

STable 10. Comparison of CAT score by severity stage in all high-risk population.

STable 11. Comparison of mMRC by severity stage in all high-risk population.

SFigure 1. Flow chart of enrolled participants.


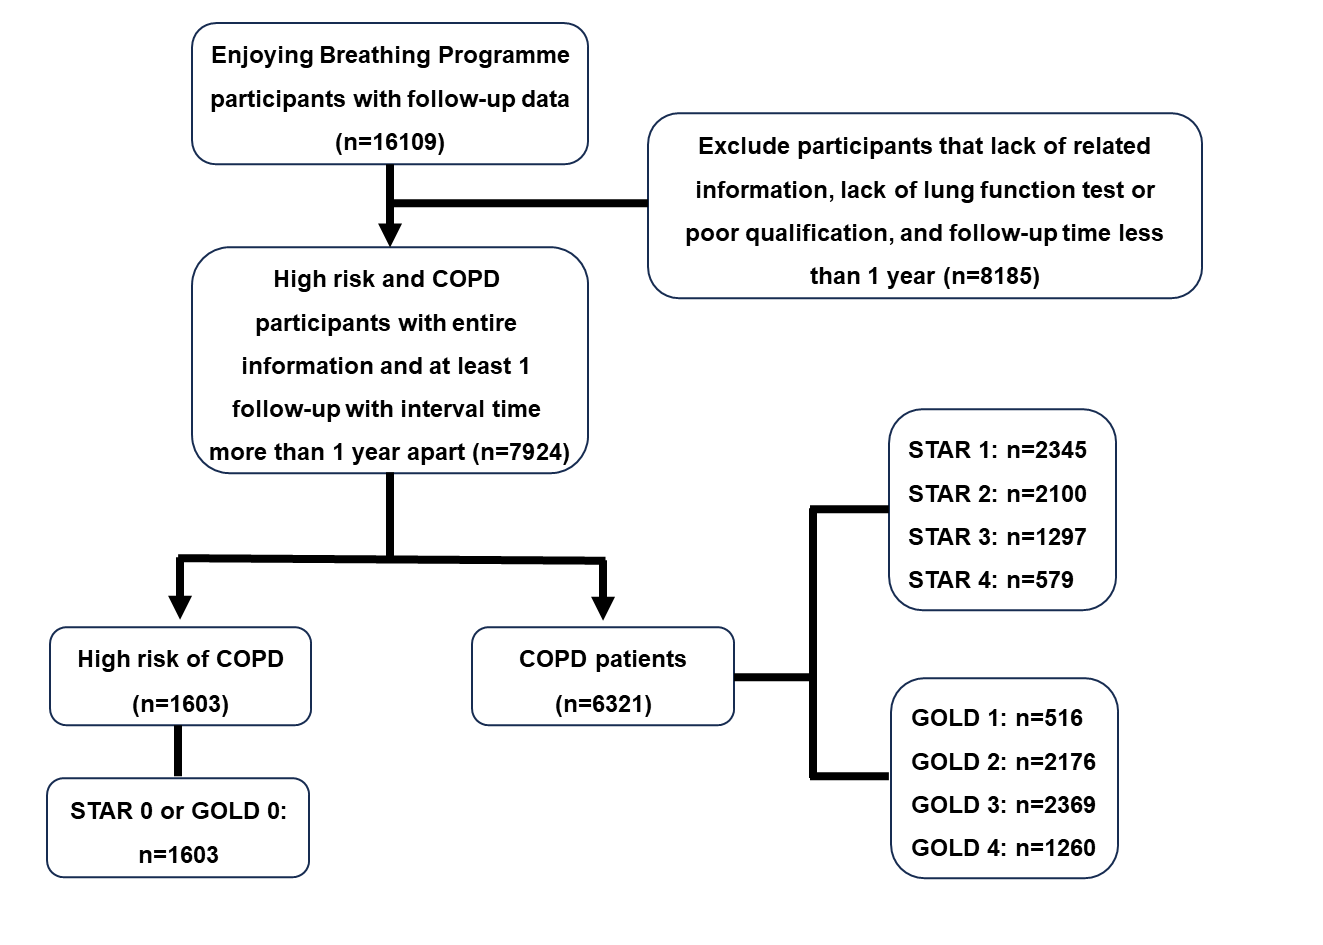


Abbreviation: COPD, chronic obstructive pulmonary disease; GOLD, Chronic Obstructive Lung Disease; STAR, Staging of Airflow obstruction by Ratio.

SFigure 2. Scatter plot considering both STAR and GOLD staging.


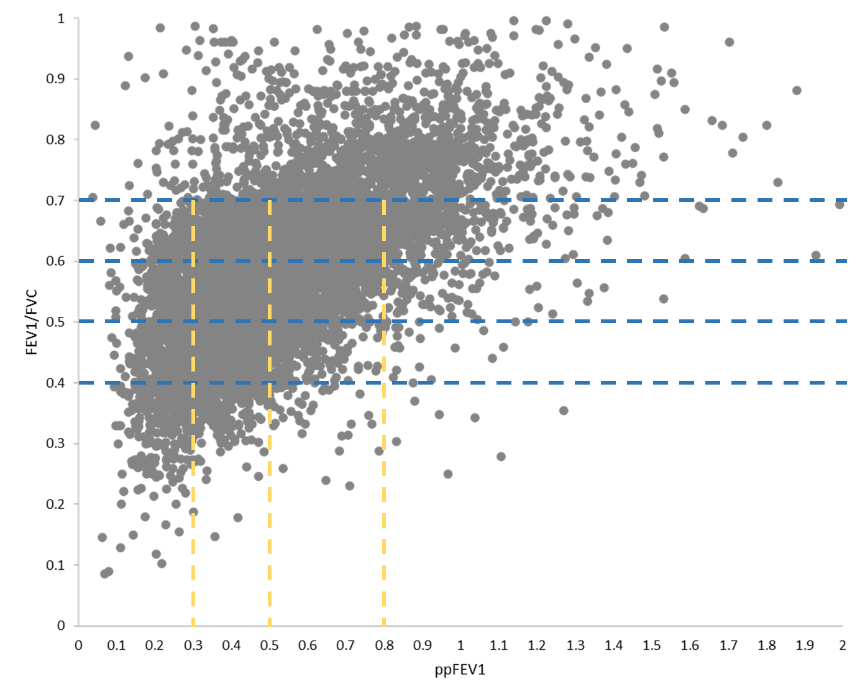


SFigure 3. Correlation between STAR staging and GOLD staging.


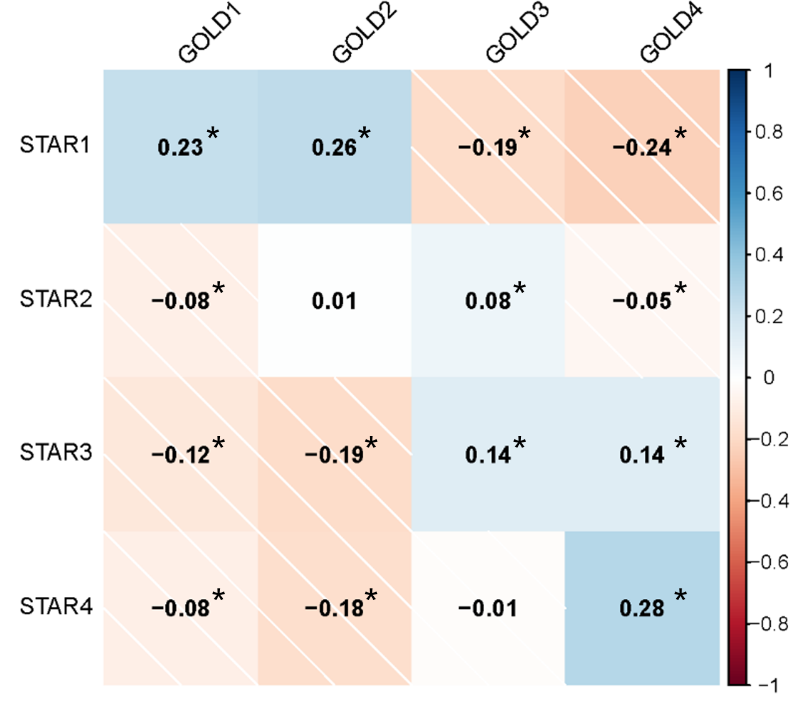


* p-value<0.05

Abbreviation: COPD, chronic obstructive pulmonary disease; GOLD, Chronic Obstructive Lung Disease; STAR, Staging of Airflow obstruction by Ratio.

STable 1. Characteristics of participants.

|  | Total | Non-smokers | Smokers |
| --- | --- | --- | --- |
| N | 7924 | 3711 | 4213 |
| Sex (female, %) | 2455 (31.0) | 2273 (61.3) | 182 (4.3) |
| Age (years, mean (SD)) | 67.24 (10.07) | 66.98 (10.50) | 67.46 (9.68) |
| Age range (%) |  |  |  |
| <40 years old | 67 (0.8) | 42 (1.1) | 25 (0.6) |
| 40-49 years old | 343 (4.3) | 181 (4.9) | 162 (3.8) |
| 50-59 years old | 1206 (15.2) | 613 (16.5) | 593 (14.1) |
| 60-69 years old | 2930 (37.0) | 1293 (34.8) | 1637 (38.9) |
| >=70 years old | 3378 (42.6) | 1582 (42.6) | 1796 (42.6) |
| Resident (%) |  |  |  |
| rural | 5453 (69.3) | 2629 (71.5) | 2824 (67.4) |
| urban | 2411 (30.7) | 1048 (28.5) | 1363 (32.6) |
| Education (%) |  |  |  |
| Primary school or less | 4934 (62.7) | 2497 (67.9) | 2437 (58.2) |
| Middle or high school | 2649 (33.7) | 1060 (28.8) | 1589 (38.0) |
| College or above | 280 (3.6) | 119 (3.2) | 161 (3.8) |
| Profession (%) |  |  |  |
| at work | 3865 (49.1) | 1846 (50.2) | 2019 (48.2) |
| retired | 3999 (50.9) | 1830 (49.8) | 2169 (51.8) |
| Income (%) |  |  |  |
| <=10000 yuan/month | 1222 (45.1) | 581 (51.5) | 641 (40.6) |
| >10000 yuan/month | 1486 (54.9) | 547 (48.5) | 939 (59.4) |
| Family members number (%) |  |  |  |
| 1 | 214 (2.8) | 110 (3.0) | 104 (2.5) |
| 2 | 3076 (39.9) | 1424 (39.4) | 1652 (40.4) |
| 3-5 | 3686 (47.9) | 1743 (48.3) | 1943 (47.5) |
| >5 | 727 (9.4) | 334 (9.2) | 393 (9.6) |
| Know COPD (%) |  |  |  |
| Don’t know | 4256 (57.8) | 1881 (55.3) | 2375 (59.8) |
| Little known | 2298 (31.2) | 1140 (33.5) | 1158 (29.2) |
| Known | 619 (8.4) | 284 (8.4) | 335 (8.4) |
| Well known | 118 (1.6) | 49 (1.4) | 69 (1.7) |
| Very well known | 78 (1.1) | 46 (1.4) | 32 (0.8) |
| Smoking status (%) |  |  |  |
| Never | 3711 (46.8) | 3711 (100.0) | 0 (0.0) |
| Former | 1962 (24.8) | 0 (0.0) | 1962 (46.6) |
| Current | 2251 (28.4) | 0 (0.0) | 2251 (53.4) |
| Second-hand smoking exposure (%) | 2315 (66.7) | 2259 (66.6) | 56 (72.7) |
| BMI (kg/m2, %) |  |  |  |
| <18.5 | 843 (10.6) | 345 (9.3) | 498 (11.8) |
| 18.5-23.9 | 4391 (55.4) | 1934 (52.1) | 2457 (58.3) |
| 24-27.9 | 2132 (26.9) | 1083 (29.2) | 1049 (24.9) |
| >=28 | 558 (7.0) | 349 (9.4) | 209 (5.0) |
| Family history of chronic respiratory disease (%) | 1867 (23.6) | 912 (24.6) | 955 (22.7) |
| CAT total score (score, mean (SD)) | 15.34 (7.44) | 15.05 (7.63) | 15.59 (7.26) |
| CAT score (%) |  |  |  |
| 0-9 | 1751 (22.1) | 890 (24.0) | 861 (20.4) |
| 10-19 | 3961 (50.0) | 1827 (49.2) | 2134 (50.7) |
| 20-29 | 1933 (24.4) | 856 (23.1) | 1077 (25.6) |
| 30-40 | 279 (3.5) | 138 (3.7) | 141 (3.3) |
| mMRC (mean (SD)) | 1.58 (0.92) | 1.55 (0.95) | 1.61 (0.90) |
| mMRC (%) |  |  |  |
| Grade 0 | 793 (10.0) | 397 (10.7) | 396 (9.4) |
| Grade 1 | 3184 (40.2) | 1598 (43.1) | 1586 (37.6) |
| Grade 2 | 2600 (32.8) | 1073 (28.9) | 1527 (36.2) |
| Grade 3 | 1217 (15.4) | 560 (15.1) | 657 (15.6) |
| Grade 4 | 130 (1.6) | 83 (2.2) | 47 (1.1) |
| Seeking medical attention for severe respiratory symptoms (%) | 3203 (40.4) | 1514 (40.8) | 1689 (40.1) |
| Number of seeking medical attention for severe respiratory symptoms (mean (SD)) | 0.70 (1.12) | 0.72 (1.14) | 0.69 (1.09) |
| Comorbidity (%) | 5378 (67.9) | 2703 (72.8) | 2675 (63.5) |
| Exposure to occupational dust (%) | 402 (5.1) | 142 (3.8) | 260 (6.2) |
| Exposure to chemical dust (%) | 70 (0.9) | 24 (0.6) | 46 (1.1) |
| Use biofuels (%) | 4089 (51.6) | 2074 (55.9) | 2015 (47.8) |
| Symptom (%) | 7210 (91.0) | 3370 (90.8) | 3840 (91.1) |
| Cough | 5562 (70.2) | 2691 (72.5) | 2871 (68.1) |
| Cough before 14 years old (%) |  |  |  |
| Rarely | 4838 (73.3) | 1995 (66.2) | 2843 (79.3) |
| Sometimes | 1113 (16.9) | 586 (19.4) | 527 (14.7) |
| Always | 649 (9.8) | 432 (14.3) | 217 (6.0) |
| Phlegm | 4865 (61.4) | 2258 (60.8) | 2607 (61.9) |
| Dyspnea | 4563 (57.6) | 1964 (52.9) | 2599 (61.7) |
| Breathlessness (%) |  |  |  |
| No shortness of breath | 1573 (19.9) | 736 (19.8) | 837 (19.9) |
| Feel shortness of breath when walking quickly on flat ground or climbing hills | 4570 (57.7) | 2191 (59.0) | 2379 (56.5) |
| Feel shortness of breath when walking normally on flat ground | 1781 (22.5) | 784 (21.1) | 997 (23.7) |
| Chest tightness | 25 (0.3) | 15 (0.4) | 10 (0.2) |
| Adherence to medication (%) | 6698 (84.5) | 3049 (82.2) | 3649 (86.6) |
| Home oxygen (%) | 532 (6.7) | 230 (6.2) | 302 (7.2) |
| Follow up days (days, median (IQR)) | 406.00 [345.00, 566.00] | 422.00 [362.00, 647.50] | 394.00 [331.00, 516.00] |
| Follow up CAT total score (scores, mean (SD)) | 14.81 (7.50) | 14.29 (7.20) | 15.26 (7.72) |
| Follow up CAT score (%) |  |  |  |
| 0-9 | 1949 (24.6) | 969 (26.1) | 980 (23.3) |
| 10-19 | 4120 (52.0) | 1930 (52.0) | 2190 (52.0) |
| 20-29 | 1426 (18.0) | 676 (18.2) | 750 (17.8) |
| 30-40 | 429 (5.4) | 136 (3.7) | 293 (7.0) |
| Follow up mMRC (scores, mean (SD)) | 1.43 (0.83) | 1.39 (0.85) | 1.45 (0.82) |
| Follow up mMRC (%) |  |  |  |
| Grade 0 | 817 (10.3) | 440 (11.9) | 377 (8.9) |
| Grade 1 | 3843 (48.5) | 1811 (48.8) | 2032 (48.2) |
| Grade 2 | 2392 (30.2) | 1049 (28.3) | 1343 (31.9) |
| Grade 3 | 822 (10.4) | 386 (10.4) | 436 (10.3) |
| Grade 4 | 50 (0.6) | 25 (0.7) | 25 (0.6) |
| Follow up seeking medical attention for severe respiratory symptoms (%) | 1437 (18.1) | 636 (17.1) | 801 (19.0) |
| Follow up numbers of Seeking medical attention for severe respiratory symptoms (mean (SD)) | 0.29 (0.74) | 0.28 (0.74) | 0.30 (0.74) |
| FVC (L, mean [SD]) | 2.35 (0.98) | 2.28 (0.95) | 2.42 (1.00) |
| ppFVC (mean [SD]) | 0.72 (0.28) | 0.76 (0.30) | 0.68 (0.26) |
| FEV1 (L, mean [SD]) | 1.42 (0.72) | 1.42 (0.71) | 1.43 (0.74) |
| ppFEV1 (mean [SD]) | 0.54 (0.26) | 0.59 (0.27) | 0.50 (0.24) |
| FEV1/FVC (mean [SD]) | 0.60 (0.16) | 0.62 (0.16) | 0.59 (0.16) |
| Star (%) |  |  |  |
| Star 0 | 1603 (20.2) | 938 (25.3) | 665 (15.8) |
| Star 1 | 2345 (29.6) | 1118 (30.1) | 1227 (29.1) |
| Star 2 | 2100 (26.5) | 910 (24.5) | 1190 (28.2) |
| Star 3 | 1297 (16.4) | 519 (14.0) | 778 (18.5) |
| Star 4 | 579 (7.3) | 226 (6.1) | 353 (8.4) |
| Gold (%) |  |  |  |
| Gold 0 | 1603 (20.2) | 938 (25.3) | 665 (15.8) |
| Gold 1 | 516 (6.5) | 273 (7.4) | 243 (5.8) |
| Gold 2 | 2176 (27.5) | 1114 (30.0) | 1062 (25.2) |
| Gold 3 | 2369 (29.9) | 986 (26.6) | 1383 (32.8) |
| Gold 4 | 1260 (15.9) | 400 (10.8) | 860 (20.4) |

Abbreviation: COPD, chronic obstructive pulmonary disease; SD, standard deviation; BMI, body mass index; CAT, COPD assessment test; mMRC, Modified Medical Research Council Dyspnea Scale; FEV1, forced expiratory volume in one second; FVC, forced vital capacity; FEV1/FVC, ratio of FEV1/FVC; ppFEV1, percentage of predicted FEV1 value; ppFVC, percentage of predicted FVC value; GOLD, Chronic Obstructive Lung Disease; STAR, Staging of Airflow obstruction by Ratio.

STable 2. Characteristics of participants according to STAR.

|  | STAR 0 | STAR 1 | STAR 2 | STAR 3 | STAR 4 | p-value |
| --- | --- | --- | --- | --- | --- | --- |
| N | 1603 | 2345 | 2100 | 1297 | 579 |  |
| Sex (female, %) | 594 (37.1) | 784 (33.4) | 631 (30.0) | 309 (23.8) | 137 (23.7) | <0.001 |
| Age (mean (SD)) | 65.86 (11.04) | 66.48 (10.08) | 68.33 (9.66) | 68.27 (9.43) | 67.86 (9.42) | <0.001 |
| Age range (%) |  |  |  |  |  | <0.001 |
| <40 years old | 27 (1.7) | 18 (0.8) | 11 (0.5) | 7 (0.5) | 4 (0.7) |  |
| 40-49 years old | 111 (6.9) | 115 (4.9) | 64 (3.0) | 34 (2.6) | 19 (3.3) |  |
| 50-59 years old | 276 (17.2) | 411 (17.5) | 275 (13.1) | 168 (13.0) | 76 (13.1) |  |
| 60-69 years old | 560 (34.9) | 883 (37.7) | 768 (36.6) | 494 (38.1) | 225 (38.9) |  |
| >=70 years old | 629 (39.2) | 918 (39.1) | 982 (46.8) | 594 (45.8) | 255 (44.0) |  |
| Resident (%) |  |  |  |  |  | 0.004 |
| rural | 1183 (69.7) | 1541 (66.7) | 1454 (69.3) | 878 (72.0) | 397 (73.1) |  |
| urban | 481 (30.3) | 775 (33.3) | 638 (30.7) | 362 (28.0) | 155 (26.9) |  |
| Education (%) |  |  |  |  |  | 0.055 |
| Primary school or less | 961 (60.6) | 1429 (61.4) | 1348 (64.8) | 824 (63.8) | 372 (64.5) |  |
| Middle or high school | 558 (35.2) | 817 (35.1) | 654 (31.4) | 433 (33.5) | 187 (32.4) |  |
| College or above | 67 (4.2) | 83 (3.6) | 78 (3.8) | 34 (2.6) | 18 (3.1) |  |
| Profession (%) |  |  |  |  |  | <0.001 |
| at work | 886 (55.8) | 1102 (47.3) | 955 (46.0) | 639 (49.5) | 283 (49.0) |  |
| retired | 701 (44.2) | 1228 (52.7) | 1123 (54.0) | 653 (50.5) | 294 (51.0) |  |
| Income (%) |  |  |  |  |  | <0.001 |
| <=10000 yuan/month | 149 (33.9) | 438 (45.3) | 370 (49.6) | 197 (49.4) | 68 (43.0) |  |
| >10000 yuan/month | 290 (66.1) | 528 (54.7) | 376 (50.4) | 202 (50.6) | 90 (57.0) |  |
| Family members number (%) |  |  |  |  |  | 0.153 |
| 1 | 41 (2.6) | 74 (3.2) | 60 (3.0) | 28 (2.2) | 11 (2.0) |  |
| 2 | 655 (42.0) | 920 (40.1) | 794 (39.2) | 487 (38.6) | 220 (39.1) |  |
| 3-5 | 723 (46.3) | 1101 (48.0) | 949 (46.9) | 629 (49.8) | 284 (50.4) |  |
| >5 | 142 (9.1) | 199 (8.7) | 220 (10.9) | 118 (9.4) | 48 (8.5) |  |
| Know COPD (%) |  |  |  |  |  | <0.001 |
| Don’t know | 723 (49.4) | 1456 (65.9) | 1211 (61.5) | 587 (48.8) | 279 (53.2) |  |
| Little known | 568 (38.8) | 556 (25.2) | 564 (28.7) | 438 (36.4) | 172 (32.8) |  |
| Known | 129 (8.8) | 133 (6.0) | 154 (7.8) | 140 (11.6) | 63 (12.0) |  |
| Well known | 23 (1.6) | 36 (1.6) | 23 (1.2) | 29 (2.4) | 7 (1.3) |  |
| Very well known | 21 (1.4) | 28 (1.3) | 16 (0.8) | 10 (0.8) | 3 (0.6) |  |
| Smoking status (%) |  |  |  |  |  | <0.001 |
| Never | 938 (58.5) | 1118 (47.7) | 910 (43.3) | 519 (40.0) | 226 (39.0) |  |
| Former | 316 (19.7) | 530 (22.6) | 542 (25.8) | 395 (30.5) | 179 (30.9) |  |
| Current | 349 (21.8) | 697 (29.7) | 648 (30.9) | 383 (29.5) | 174 (30.1) |  |
| Second-hand smoking exposure (%) | 591 (68.8) | 717 (68.5) | 570 (66.7) | 287 (58.1) | 150 (69.1) | <0.001 |
| BMI (kg/m2, %) |  |  |  |  |  | <0.001 |
| <18.5 | 105 (6.6) | 199 (8.5) | 257 (12.2) | 172 (13.3) | 110 (19.0) |  |
| 18.5-23.9 | 835 (52.1) | 1253 (53.4) | 1203 (57.3) | 766 (59.1) | 334 (57.7) |  |
| 24-27.9 | 503 (31.4) | 694 (29.6) | 527 (25.1) | 295 (22.7) | 113 (19.5) |  |
| >=28 | 160 (10.0) | 199 (8.5) | 113 (5.4) | 64 (4.9) | 22 (3.8) |  |
| Family history of chronic respiratory disease (%) | 360 (22.5) | 583 (24.9) | 492 (23.4) | 297 (22.9) | 135 (23.3) | 0.457 |
| CAT total score (mean (SD)) | 13.97 (7.67) | 13.41 (7.28) | 15.87 (6.78) | 17.65 (6.90) | 19.84 (7.32) | <0.001 |
| CAT score (%) |  |  |  |  |  | <0.001 |
| 0-9 | 465 (29.0) | 733 (31.3) | 361 (17.2) | 140 (10.8) | 52 (9.0) |  |
| 10-19 | 788 (49.2) | 1127 (48.1) | 1146 (54.6) | 669 (51.6) | 231 (39.9) |  |
| 20-29 | 290 (18.1) | 460 (19.6) | 536 (25.5) | 411 (31.7) | 236 (40.8) |  |
| 30-40 | 60 (3.7) | 25 (1.1) | 57 (2.7) | 77 (5.9) | 60 (10.4) |  |
| mMRC (mean (SD)) | 1.35 (0.94) | 1.40 (0.87) | 1.66 (0.86) | 1.86 (0.89) | 2.08 (0.95) | <0.001 |
| mMRC (%) |  |  |  |  |  | <0.001 |
| Grade 0 | 264 (16.5) | 315 (13.4) | 138 (6.6) | 53 (4.1) | 23 (4.0) |  |
| Grade 1 | 738 (46.0) | 1059 (45.2) | 820 (39.0) | 425 (32.8) | 142 (24.5) |  |
| Grade 2 | 406 (25.3) | 705 (30.1) | 781 (37.2) | 500 (38.6) | 208 (35.9) |  |
| Grade 3 | 164 (10.2) | 253 (10.8) | 336 (16.0) | 285 (22.0) | 179 (30.9) |  |
| Grade 4 | 31 (1.9) | 13 (0.6) | 25 (1.2) | 34 (2.6) | 27 (4.7) |  |
| Seeking medical attention for severe respiratory symptoms (%) | 531 (33.1) | 841 (35.9) | 916 (43.6) | 642 (49.5) | 273 (47.2) | <0.001 |
| Number of seeking medical attention for severe respiratory symptoms (mean (SD)) | 0.61 (1.16) | 0.60 (1.04) | 0.74 (1.07) | 0.86 (1.17) | 0.86 (1.26) | <0.001 |
| Comorbidity (%) | 1042 (65.0) | 1582 (67.5) | 1469 (70.0) | 918 (70.8) | 367 (63.4) | <0.001 |
| Exposure to occupational dust (%) | 56 (3.5) | 121 (5.2) | 120 (5.7) | 75 (5.8) | 30 (5.2) | 0.021 |
| Exposure to chemical dust (%) | 18 (1.1) | 17 (0.7) | 18 (0.9) | 14 (1.1) | 3 (0.5) | 0.526 |
| Use biofuels (%) | 780 (48.7) | 1298 (55.4) | 1124 (53.5) | 619 (47.7) | 268 (46.3) | <0.001 |
| Symptom (%) | 1355 (84.5) | 2080 (88.7) | 2008 (95.6) | 1234 (95.1) | 533 (92.1) | <0.001 |
| Cough | 991 (61.8) | 1588 (67.7) | 1541 (73.4) | 1006 (77.6) | 436 (75.3) | <0.001 |
| Cough before 14 years old (%) |  |  |  |  |  | <0.001 |
| Rarely | 924 (70.2) | 1505 (75.1) | 1337 (76.1) | 775 (73.2) | 297 (63.9) |  |
| Sometimes | 208 (15.8) | 323 (16.1) | 277 (15.8) | 186 (17.6) | 119 (25.6) |  |
| Always | 185 (14.0) | 175 (8.7) | 142 (8.1) | 98 (9.3) | 49 (10.5) |  |
| Phlegm | 788 (49.2) | 1444 (61.6) | 1340 (63.8) | 906 (69.9) | 387 (66.8) | <0.001 |
| Dyspnea | 741 (46.2) | 1182 (50.4) | 1349 (64.2) | 884 (68.2) | 407 (70.3) | <0.001 |
| Breathlessness (%) |  |  |  |  |  | <0.001 |
| No shortness of breath | 410 (25.6) | 596 (25.4) | 327 (15.6) | 156 (12.0) | 84 (14.5) |  |
| Feel shortness of breath when walking quickly on flat ground or climbing hills | 924 (57.6) | 1302 (55.5) | 1265 (60.2) | 762 (58.8) | 317 (54.7) |  |
| Feel shortness of breath when walking normally on flat ground | 269 (16.8) | 447 (19.1) | 508 (24.2) | 379 (29.2) | 178 (30.7) |  |
| Chest tightness | 0 (0.0) | 4 (0.2) | 10 (0.5) | 7 (0.5) | 4 (0.7) | 0.011 |
| Adherence to medication (%) | 1299 (81.0) | 1871 (79.8) | 1815 (86.4) | 1182 (91.1) | 531 (91.7) | <0.001 |
| Home oxygen (%) | 60 (3.7) | 107 (4.6) | 156 (7.4) | 125 (9.6) | 84 (14.5) | <0.001 |
| Follow up days (median (IQR)) | 430.00 [362.00, 720.00] | 400.00 [346.00, 535.00] | 399.00 [336.00, 519.25] | 408.00 [343.00, 556.00] | 387.00 [301.00, 545.50] | <0.001 |
| Follow up CAT total score (mean (SD)) | 13.80 (6.90) | 13.67 (7.98) | 15.33 (7.44) | 16.02 (6.65) | 17.55 (7.73) | <0.001 |
| Follow up CAT score (%) |  |  |  |  |  | <0.001 |
| 0-9 | 443 (27.6) | 776 (33.1) | 466 (22.2) | 181 (14.0) | 83 (14.3) |  |
| 10-19 | 839 (52.3) | 1053 (44.9) | 1128 (53.7) | 803 (61.9) | 297 (51.3) |  |
| 20-29 | 289 (18.0) | 396 (16.9) | 374 (17.8) | 236 (18.2) | 131 (22.6) |  |
| 30-40 | 32 (2.0) | 120 (5.1) | 132 (6.3) | 77 (5.9) | 68 (11.7) |  |
| Follow up mMRC (mean (SD)) | 1.19 (0.79) | 1.31 (0.81) | 1.47 (0.80) | 1.65 (0.81) | 1.88 (0.90) | <0.001 |
| Follow up mMRC (%) |  |  |  |  |  | <0.001 |
| Grade 0 | 264 (16.5) | 298 (12.7) | 175 (8.3) | 56 (4.3) | 24 (4.1) |  |
| Grade 1 | 882 (55.0) | 1225 (52.2) | 994 (47.3) | 556 (42.9) | 186 (32.1) |  |
| Grade 2 | 360 (22.5) | 616 (26.3) | 719 (34.2) | 480 (37.0) | 217 (37.5) |  |
| Grade 3 | 89 (5.6) | 198 (8.4) | 202 (9.6) | 195 (15.0) | 138 (23.8) |  |
| Grade 4 | 8 (0.5) | 8 (0.3) | 10 (0.5) | 10 (0.8) | 14 (2.4) |  |
| Follow up acute exacerbation (%) | 205 (12.8) | 410 (17.5) | 418 (19.9) | 286 (22.1) | 118 (20.4) | <0.001 |
| Follow up acute exacerbation number (mean (SD)) | 0.23 (0.72) | 0.25 (0.66) | 0.31 (0.72) | 0.37 (0.83) | 0.35 (0.93) | <0.001 |
| FVC (L, mean [SD]) | 2.48 (1.08) | 2.44 (0.99) | 2.22 (0.91) | 2.22 (0.84) | 2.44 (1.12) | <0.001 |
| ppFVC (mean [SD]) | 0.75 (0.31) | 0.74 (0.26) | 0.68 (0.26) | 0.67 (0.25) | 0.74 (0.36) | <0.001 |
| FEV1 (L, mean [SD]) | 2.00 (0.88) | 1.58 (0.65) | 1.22 (0.51) | 1.01 (0.38) | 0.82 (0.35) | <0.001 |
| ppFEV1 (mean [SD]) | 0.76 (0.32) | 0.60 (0.22) | 0.47 (0.19) | 0.38 (0.14) | 0.32 (0.15) | <0.001 |
| FEV1/FVC (mean [SD]) | 0.82 (0.15) | 0.65 (0.03) | 0.55 (0.03) | 0.45 (0.03) | 0.34 (0.05) | <0.001 |
| Gold (%) |  |  |  |  |  | <0.001 |
| Gold 0 | 1603 (100.0) | 0 (0.0) | 0 (0.0) | 0 (0.0) | 0 (0.0) |  |
| Gold 1 | 0 (0.0) | 384 (16.4) | 106 (5.0) | 19 (1.5) | 7 (1.2) |  |
| Gold 2 | 0 (0.0) | 1180 (50.3) | 734 (35.0) | 218 (16.8) | 44 (7.6) |  |
| Gold 3 | 0 (0.0) | 604 (25.8) | 899 (42.8) | 659 (50.8) | 207 (35.8) |  |
| Gold 4 | 0 (0.0) | 177 (7.5) | 361 (17.2) | 401 (30.9) | 321 (55.4) |  |

Abbreviation: COPD, chronic obstructive pulmonary disease; SD, standard deviation; BMI, body mass index; CAT, COPD assessment test; mMRC, Modified Medical Research Council Dyspnea Scale; FEV1, forced expiratory volume in one second; FVC, forced vital capacity; FEV1/FVC, ratio of FEV1/FVC; ppFEV1, percentage of predicted FEV1 value; ppFVC, percentage of predicted FVC value; GOLD, Chronic Obstructive Lung Disease; STAR, Staging of Airflow obstruction by Ratio.

STable 3. Characteristics of participants according to GOLD.

|  | GOLD 0 | GOLD 1 | GOLD 2 | GOLD 3 | GOLD 4 | p-value |
| --- | --- | --- | --- | --- | --- | --- |
| N | 1603 | 516 | 2176 | 2369 | 1260 |  |
| Sex (female, %) | 594 (37.1) | 221 (42.8) | 766 (35.2) | 656 (27.7) | 218 (17.3) | <0.001 |
| Age (mean (SD)) | 65.86 (11.04) | 66.83 (10.75) | 66.80 (10.23) | 68.54 (9.40) | 67.48 (9.13) | <0.001 |
| Age range (%) |  |  |  |  |  | <0.001 |
| <40 years old | 27 (1.7) | 3 (0.6) | 22 (1.0) | 10 (0.4) | 5 (0.4) |  |
| 40-49 years old | 111 (6.9) | 33 (6.4) | 103 (4.7) | 59 (2.5) | 37 (2.9) |  |
| 50-59 years old | 276 (17.2) | 82 (15.9) | 361 (16.6) | 301 (12.7) | 186 (14.8) |  |
| 60-69 years old | 560 (34.9) | 181 (35.1) | 804 (36.9) | 877 (37.0) | 508 (40.3) |  |
| >=70 years old | 629 (39.2) | 217 (42.1) | 886 (40.7) | 1122 (47.4) | 524 (41.6) |  |
| Resident (%) |  |  |  |  |  | 0.775 |
| rural | 1183 (69.7) | 347 (68.2) | 1468 (68.8) | 1608 (69.2) | 847 (70.7) |  |
| urban | 481 (30.3) | 160 (31.8) | 674 (31.2) | 727 (30.8) | 369 (29.3) |  |
| Education (%) |  |  |  |  |  | 0.066 |
| Primary school or less | 961 (60.6) | 304 (60.6) | 1348 (62.4) | 1514 (64.2) | 807 (64.1) |  |
| Middle or high school | 558 (35.2) | 171 (34.1) | 733 (34.0) | 774 (32.8) | 413 (32.8) |  |
| College or above | 67 (4.2) | 27 (5.4) | 78 (3.6) | 70 (3.0) | 38 (3.0) |  |
| Profession (%) |  |  |  |  |  | <0.001 |
| at work | 886 (55.8) | 255 (50.7) | 1011 (46.8) | 1065 (45.2) | 648 (51.6) |  |
| retired | 701 (44.2) | 248 (49.3) | 1149 (53.2) | 1292 (54.8) | 609 (48.4) |  |
| Income (%) |  |  |  |  |  | <0.001 |
| <=10000 yuan/month | 149 (33.9) | 64 (36.4) | 339 (46.5) | 427 (49.3) | 243 (48.8) |  |
| >10000 yuan/month | 290 (66.1) | 112 (63.6) | 390 (53.5) | 439 (50.7) | 255 (51.2) |  |
| Family members number (%) |  |  |  |  |  | 0.037 |
| 1 | 41 (2.6) | 12 (2.4) | 49 (2.3) | 75 (3.3) | 37 (3.0) |  |
| 2 | 655 (42.0) | 202 (40.8) | 832 (39.2) | 918 (39.8) | 469 (38.5) |  |
| 3-5 | 723 (46.3) | 223 (45.1) | 1036 (48.8) | 1080 (46.9) | 624 (51.2) |  |
| >5 | 142 (9.1) | 58 (11.7) | 207 (9.7) | 231 (10.0) | 89 (7.3) |  |
| Know COPD (%) |  |  |  |  |  | <0.001 |
| Don’t know | 723 (49.4) | 247 (54.4) | 1231 (60.3) | 1335 (60.4) | 720 (60.0) |  |
| Little known | 568 (38.8) | 158 (34.8) | 602 (29.5) | 644 (29.2) | 326 (27.1) |  |
| Known | 129 (8.8) | 37 (8.1) | 156 (7.6) | 181 (8.2) | 116 (9.7) |  |
| Well known | 23 (1.6) | 7 (1.5) | 29 (1.4) | 29 (1.3) | 30 (2.5) |  |
| Very well known | 21 (1.4) | 5 (1.1) | 23 (1.1) | 20 (0.9) | 9 (0.7) |  |
| Smoking status (%) |  |  |  |  |  | <0.001 |
| Never | 938 (58.5) | 273 (52.9) | 1114 (51.2) | 986 (41.6) | 400 (31.7) |  |
| Former | 316 (19.7) | 88 (17.1) | 431 (19.8) | 670 (28.3) | 457 (36.3) |  |
| Current | 349 (21.8) | 155 (30.0) | 631 (29.0) | 713 (30.1) | 403 (32.0) |  |
| Second-hand smoking exposure (%) | 591 (68.8) | 170 (69.1) | 686 (65.7) | 599 (64.4) | 269 (68.6) | 0.226 |
| BMI (kg/m2, %) |  |  |  |  |  | <0.001 |
| <18.5 | 105 (6.6) | 34 (6.6) | 188 (8.6) | 297 (12.5) | 219 (17.4) |  |
| 18.5-23.9 | 835 (52.1) | 281 (54.5) | 1207 (55.5) | 1355 (57.2) | 713 (56.6) |  |
| 24-27.9 | 503 (31.4) | 170 (32.9) | 604 (27.8) | 579 (24.4) | 276 (21.9) |  |
| >=28 | 160 (10.0) | 31 (6.0) | 177 (8.1) | 138 (5.8) | 52 (4.1) |  |
| Family history of chronic respiratory disease (%) | 360 (22.5) | 109 (21.1) | 451 (20.7) | 587 (24.8) | 360 (28.6) | <0.001 |
| CAT total score (mean (SD)) | 13.97 (7.67) | 12.14 (7.70) | 13.69 (7.54) | 16.73 (6.83) | 18.62 (6.13) | <0.001 |
| CAT score (%) |  |  |  |  |  | <0.001 |
| 0-9 | 465 (29.0) | 199 (38.6) | 667 (30.7) | 344 (14.5) | 76 (6.0) |  |
| 10-19 | 788 (49.2) | 226 (43.8) | 1035 (47.6) | 1270 (53.6) | 642 (51.0) |  |
| 20-29 | 290 (18.1) | 81 (15.7) | 416 (19.1) | 654 (27.6) | 492 (39.0) |  |
| 30-40 | 60 (3.7) | 10 (1.9) | 58 (2.7) | 101 (4.3) | 50 (4.0) |  |
| mMRC (mean (SD)) | 1.35 (0.94) | 1.18 (0.84) | 1.38 (0.84) | 1.75 (0.87) | 2.10 (0.88) | <0.001 |
| mMRC (%) |  |  |  |  |  | <0.001 |
| Grade 0 | 264 (16.5) | 103 (20.0) | 275 (12.6) | 124 (5.2) | 27 (2.1) |  |
| Grade 1 | 738 (46.0) | 257 (49.8) | 1025 (47.1) | 859 (36.3) | 305 (24.2) |  |
| Grade 2 | 406 (25.3) | 120 (23.3) | 666 (30.6) | 910 (38.4) | 498 (39.5) |  |
| Grade 3 | 164 (10.2) | 33 (6.4) | 195 (9.0) | 445 (18.8) | 380 (30.2) |  |
| Grade 4 | 31 (1.9) | 3 (0.6) | 15 (0.7) | 31 (1.3) | 50 (4.0) |  |
| Seeking medical attention for severe respiratory symptoms (%) | 531 (33.1) | 147 (28.5) | 796 (36.6) | 1108 (46.8) | 621 (49.3) | <0.001 |
| Number of seeking medical attention for severe respiratory symptoms (mean (SD)) | 0.61 (1.16) | 0.41 (0.82) | 0.60 (1.02) | 0.81 (1.12) | 0.91 (1.25) | <0.001 |
| Comorbidity (%) | 1042 (65.0) | 324 (62.8) | 1519 (69.8) | 1644 (69.4) | 849 (67.4) | 0.001 |
| Exposure to occupational dust (%) | 56 (3.5) | 24 (4.7) | 119 (5.5) | 136 (5.7) | 67 (5.3) | 0.021 |
| Exposure to chemical dust (%) | 18 (1.1) | 0 (0.0) | 23 (1.1) | 19 (0.8) | 10 (0.8) | 0.153 |
| Use biofuels (%) | 780 (48.7) | 300 (58.1) | 1154 (53.0) | 1203 (50.8) | 652 (51.7) | 0.002 |
| Symptom (%) | 1355 (84.5) | 429 (83.1) | 1937 (89.0) | 2250 (95.0) | 1239 (98.3) | <0.001 |
| Cough | 991 (61.8) | 354 (68.6) | 1584 (72.8) | 1721 (72.6) | 912 (72.4) | <0.001 |
| Cough before 14 years old (%) |  |  |  |  |  | <0.001 |
| Rarely | 924 (70.2) | 291 (71.3) | 1322 (72.4) | 1522 (76.4) | 779 (73.6) |  |
| Sometimes | 208 (15.8) | 77 (18.9) | 325 (17.8) | 300 (15.1) | 203 (19.2) |  |
| Always | 185 (14.0) | 40 (9.8) | 179 (9.8) | 169 (8.5) | 76 (7.2) |  |
| Phlegm | 788 (49.2) | 312 (60.5) | 1358 (62.4) | 1568 (66.2) | 839 (66.6) | <0.001 |
| Dyspnea | 741 (46.2) | 200 (38.8) | 1135 (52.2) | 1562 (65.9) | 925 (73.4) | <0.001 |
| Breathlessness (%) |  |  |  |  |  | <0.001 |
| No shortness of breath | 410 (25.6) | 158 (30.6) | 532 (24.4) | 342 (14.4) | 131 (10.4) |  |
| Feel shortness of breath when walking quickly on flat ground or climbing hills | 924 (57.6) | 291 (56.4) | 1289 (59.2) | 1392 (58.8) | 674 (53.5) |  |
| Feel shortness of breath when walking normally on flat ground | 269 (16.8) | 67 (13.0) | 355 (16.3) | 635 (26.8) | 455 (36.1) |  |
| Chest tightness | 0 (0.0) | 1 (0.2) | 11 (0.5) | 9 (0.4) | 4 (0.3) | 0.087 |
| Adherence to medication (%) | 1299 (81.0) | 394 (76.4) | 1730 (79.5) | 2094 (88.4) | 1181 (93.7) | <0.001 |
| Home oxygen (%) | 60 (3.7) | 16 (3.1) | 94 (4.3) | 166 (7.0) | 196 (15.6) | <0.001 |
| Follow up days (median (IQR)) | 430.00 [362.00, 720.00] | 425.00 [359.50, 601.50] | 407.00 [344.00, 551.25] | 397.00 [330.00, 510.00] | 398.00 [345.00, 502.25] | <0.001 |
| Follow up CAT total score (mean (SD)) | 13.80 (6.90) | 11.63 (7.65) | 13.09 (7.63) | 15.90 (7.04) | 18.28 (7.11) | <0.001 |
| Follow up CAT score (%) |  |  |  |  |  | <0.001 |
| 0-9 | 443 (27.6) | 222 (43.0) | 755 (34.7) | 413 (17.4) | 116 (9.2) |  |
| 10-19 | 839 (52.3) | 213 (41.3) | 1043 (47.9) | 1314 (55.5) | 711 (56.4) |  |
| 20-29 | 289 (18.0) | 67 (13.0) | 272 (12.5) | 500 (21.1) | 298 (23.7) |  |
| 30-40 | 32 (2.0) | 14 (2.7) | 106 (4.9) | 142 (6.0) | 135 (10.7) |  |
| Follow up mMRC (mean (SD)) | 1.19 (0.79) | 1.09 (0.75) | 1.28 (0.79) | 1.59 (0.81) | 1.80 (0.85) | <0.001 |
| Follow up mMRC (%) |  |  |  |  |  | <0.001 |
| Grade 0 | 264 (16.5) | 98 (19.0) | 300 (13.8) | 119 (5.0) | 36 (2.9) |  |
| Grade 1 | 882 (55.0) | 295 (57.2) | 1118 (51.4) | 1080 (45.6) | 468 (37.1) |  |
| Grade 2 | 360 (22.5) | 101 (19.6) | 613 (28.2) | 828 (35.0) | 490 (38.9) |  |
| Grade 3 | 89 (5.6) | 21 (4.1) | 141 (6.5) | 331 (14.0) | 240 (19.0) |  |
| Grade 4 | 8 (0.5) | 1 (0.2) | 4 (0.2) | 11 (0.5) | 26 (2.1) |  |
| Follow up acute exacerbation (%) | 205 (12.8) | 54 (10.5) | 354 (16.3) | 510 (21.5) | 314 (24.9) | <0.001 |
| Follow up acute exacerbation number (mean (SD)) | 0.23 (0.72) | 0.16 (0.54) | 0.24 (0.63) | 0.34 (0.83) | 0.40 (0.81) | <0.001 |
| FVC (L, mean [SD]) | 2.48 (1.08) | 3.82 (1.08) | 2.80 (0.72) | 2.03 (0.60) | 1.43 (0.51) | <0.001 |
| ppFVC (mean [SD]) | 0.75 (0.31) | 1.21 (0.29) | 0.85 (0.16) | 0.62 (0.14) | 0.42 (0.13) | <0.001 |
| FEV1 (L, mean [SD]) | 2.00 (0.88) | 2.36 (0.59) | 1.64 (0.41) | 1.04 (0.24) | 0.64 (0.15) | <0.001 |
| ppFEV1 (mean [SD]) | 0.76 (0.32) | 0.94 (0.17) | 0.63 (0.08) | 0.40 (0.06) | 0.24 (0.05) | <0.001 |
| FEV1/FVC (mean [SD]) | 0.82 (0.15) | 0.63 (0.07) | 0.59 (0.08) | 0.53 (0.09) | 0.47 (0.11) | <0.001 |
| Star (%) |  |  |  |  |  | <0.001 |
| Star 0 | 1603 (100.0) | 0 (0.0) | 0 (0.0) | 0 (0.0) | 0 (0.0) |  |
| Star 1 | 0 (0.0) | 384 (74.4) | 1180 (54.2) | 604 (25.5) | 177 (14.0) |  |
| Star 2 | 0 (0.0) | 106 (20.5) | 734 (33.7) | 899 (37.9) | 361 (28.7) |  |
| Star 3 | 0 (0.0) | 19 (3.7) | 218 (10.0) | 659 (27.8) | 401 (31.8) |  |
| Star 4 | 0 (0.0) | 7 (1.4) | 44 (2.0) | 207 (8.7) | 321 (25.5) |  |

Abbreviation: COPD, chronic obstructive pulmonary disease; SD, standard deviation; BMI, body mass index; CAT, COPD assessment test; mMRC, Modified Medical Research Council Dyspnea Scale; FEV1, forced expiratory volume in one second; FVC, forced vital capacity; FEV1/FVC, ratio of FEV1/FVC; ppFEV1, percentage of predicted FEV1 value; ppFVC, percentage of predicted FVC value; GOLD, Chronic Obstructive Lung Disease; STAR, Staging of Airflow obstruction by Ratio.

STable 4. Comparison of seeking medical attention for severe respiratory symptoms in 3 months before follow-up by severity stage in all high-risk population using HR and 95%CI.

| stage | star | | gold | |
| --- | --- | --- | --- | --- |
| unadjusted | adjusted | unadjusted | adjusted |
| All population | | | | |
| 0 | ref | ref | ref | ref |
| I | 1.77 (1.50, 2.10) | 1.69 (1.43, 2.00) | 0.93 (0.69, 1.25) | 0.83 (0.61, 1.12) |
| II | 1.99 (1.68, 2.35) | 1.85 (1.56, 2.19) | 1.57 (1.32, 1.87) | 1.50 (1.26, 1.78) |
| III | 1.95 (1.63, 2.33) | 1.77 (1.48, 2.12) | 2.18 (1.85, 2.57) | 1.98 (1.69, 2.34) |
| IV | 2.04 (1.62, 2.56) | 1.90 (1.52, 2.39) | 2.45 (2.06, 2.93) | 2.39 (2.00, 2.86) |
| Smokers | | | | |
| 0 | ref | ref | ref | ref |
| I | 1.87 (1.46, 2.40) | 1.76 (1.37, 2.25) | 0.87 (0.56, 1.35) | 0.77 (0.49, 1.20) |
| II | 1.99 (1.55, 2.54) | 1.86 (1.45, 2.37) | 1.68 (1.30, 2.17) | 1.61 (1.25, 2.08) |
| III | 1.78 (1.37, 2.32) | 1.64 (1.26, 2.14) | 2.06 (1.62, 2.62) | 1.84 (1.44, 2.34) |
| IV | 1.92 (1.40, 2.64) | 1.86 (1.35, 2.55) | 2.25 (1.75, 2.91) | 2.21 (1.71, 2.85) |
| Non-smokers | | | | |
| 0 | ref | ref | ref | ref |
| I | 1.60 (1.27, 2.02) | 1.55 (1.23, 1.95) | 0.96 (0.63, 1.45) | 0.85 (0.56, 1.28) |
| II | 1.87 (1.48, 2.37) | 1.77 (1.40, 2.24) | 1.43 (1.13, 1.81) | 1.37 (1.08, 1.73) |
| III | 2.04 (1.59, 2.62) | 1.98 (1.54, 2.55) | 2.21 (1.76, 2.76) | 2.11 (1.68, 2.64) |
| IV | 2.02 (1.44, 2.84) | 1.95 (1.39, 2.73) | 2.51 (1.94, 3.24) | 2.56 (1.98, 3.31) |

Abbreviation: GOLD, Chronic Obstructive Lung Disease; STAR, Staging of Airflow obstruction by Ratio; ref, reference; HR, hazard ratio; CI, confidence interval.

Adjusted model: model adjusted for age, sex, and height.

STable 5. Comparison of seeking medical attention for severe respiratory symptoms in 3 months before follow-up by severity stage combining STAR and GOLD in COPD patients using HR and 95%CI.

|  | STAR 1 | STAR 2 | STAR 3 | STAR 4 |
| --- | --- | --- | --- | --- |
| GOLD 1 | Ref | 1.53 (0.85, 2.77) | 0.41 (0.10, 1.74) | 0.78 (0.11, 5.70) |
| GOLD 2 | 2.08 (1.45, 2.97) | 1.91 (1.31, 2.78) | 1.50 (0.91, 2.48) | 0.80 (0.25, 2.61) |
| GOLD 3 | 2.95 (2.03, 4.29) | 2.43 (1.70, 3.49) | 2.49 (1.72, 3.60) | 2.30 (1.43, 3.70) |
| GOLD 4 | 3.94 (2.49, 6.23) | 4.08 (2.75, 6.04) | 2.53 (1.72, 3.72) | 2.87 (1.93, 4.27) |

Abbreviation: COPD, chronic obstructive pulmonary disease; GOLD, Chronic Obstructive Lung Disease; STAR, Staging of Airflow obstruction by Ratio; HR, hazard ratio; CI, confidence interval.

Adjusted for age, sex, and height.

STable 6. Symptoms of participants according to STAR.

|  | STAR 0 | STAR 1 | STAR 2 | STAR 3 | STAR 4 | p-value |
| --- | --- | --- | --- | --- | --- | --- |
| All population | | | | | | |
| Follow up CAT total score (mean (SD)) | 13.80 (6.90) | 13.67 (7.98) | 15.33 (7.44) | 16.02 (6.65) | 17.55 (7.73) | <0.001 |
| Follow up CAT score (%) |  |  |  |  |  | <0.001 |
| 0-9 | 443 (27.6) | 776 (33.1) | 466 (22.2) | 181 (14.0) | 83 (14.3) |  |
| 10-19 | 839 (52.3) | 1053 (44.9) | 1128 (53.7) | 803 (61.9) | 297 (51.3) |  |
| 20-29 | 289 (18.0) | 396 (16.9) | 374 (17.8) | 236 (18.2) | 131 (22.6) |  |
| 30-40 | 32 (2.0) | 120 (5.1) | 132 (6.3) | 77 (5.9) | 68 (11.7) |  |
| Follow up mMRC (mean (SD)) | 1.19 (0.79) | 1.31 (0.81) | 1.47 (0.80) | 1.65 (0.81) | 1.88 (0.90) | <0.001 |
| Follow up mMRC (%) |  |  |  |  |  | <0.001 |
| Grade 0 | 264 (16.5) | 298 (12.7) | 175 (8.3) | 56 (4.3) | 24 (4.1) |  |
| Grade 1 | 882 (55.0) | 1225 (52.2) | 994 (47.3) | 556 (42.9) | 186 (32.1) |  |
| Grade 2 | 360 (22.5) | 616 (26.3) | 719 (34.2) | 480 (37.0) | 217 (37.5) |  |
| Grade 3 | 89 (5.6) | 198 (8.4) | 202 (9.6) | 195 (15.0) | 138 (23.8) |  |
| Grade 4 | 8 (0.5) | 8 (0.3) | 10 (0.5) | 10 (0.8) | 14 (2.4) |  |
|  | | | | | | |
| Smokers | | | | | | |
| Follow up CAT total score (mean (SD)) | 14.14 (7.14) | 14.22 (8.24) | 15.71 (7.64) | 16.14 (7.06) | 17.53 (7.76) | <0.001 |
| Follow up CAT score (%) |  |  |  |  |  | <0.001 |
| 0-9 | 165 (24.8) | 386 (31.5) | 259 (21.8) | 115 (14.8) | 55 (15.6) |  |
| 10-19 | 365 (54.9) | 547 (44.6) | 628 (52.8) | 473 (60.8) | 177 (50.1) |  |
| 20-29 | 115 (17.3) | 214 (17.4) | 212 (17.8) | 129 (16.6) | 80 (22.7) |  |
| 30-40 | 20 (3.0) | 80 (6.5) | 91 (7.6) | 61 (7.8) | 41 (11.6) |  |
| Follow up mMRC (mean (SD)) | 1.26 (0.81) | 1.33 (0.80) | 1.46 (0.78) | 1.60 (0.78) | 1.89 (0.86) | <0.001 |
| Follow up mMRC (%) |  |  |  |  |  | <0.001 |
| Grade 0 | 100 (15.0) | 147 (12.0) | 87 (7.3) | 29 (3.7) | 14 (4.0) |  |
| Grade 1 | 345 (51.9) | 636 (51.8) | 585 (49.2) | 359 (46.1) | 107 (30.3) |  |
| Grade 2 | 174 (26.2) | 339 (27.6) | 403 (33.9) | 287 (36.9) | 140 (39.7) |  |
| Grade 3 | 41 (6.2) | 101 (8.2) | 109 (9.2) | 97 (12.5) | 88 (24.9) |  |
| Grade 4 | 5 (0.8) | 4 (0.3) | 6 (0.5) | 6 (0.8) | 4 (1.1) |  |
|  | | | | | | |
| Non-smokers | | | | | | |
| Follow up CAT total score (mean (SD)) | 13.57 (6.71) | 13.06 (7.64) | 14.83 (7.15) | 15.84 (6.00) | 17.58 (7.72) | <0.001 |
| Follow up CAT score (%) |  |  |  |  |  | <0.001 |
| 0-9 | 278 (29.6) | 390 (34.9) | 207 (22.7) | 66 (12.7) | 28 (12.4) |  |
| 10-19 | 474 (50.5) | 506 (45.3) | 500 (54.9) | 330 (63.6) | 120 (53.1) |  |
| 20-29 | 174 (18.6) | 182 (16.3) | 162 (17.8) | 107 (20.6) | 51 (22.6) |  |
| 30-40 | 12 (1.3) | 40 (3.6) | 41 (4.5) | 16 (3.1) | 27 (11.9) |  |
| Follow up mMRC (mean (SD)) | 1.14 (0.77) | 1.30 (0.82) | 1.47 (0.82) | 1.72 (0.85) | 1.87 (0.96) | <0.001 |
| Follow up mMRC (%) |  |  |  |  |  | <0.001 |
| Grade 0 | 164 (17.5) | 151 (13.5) | 88 (9.7) | 27 (5.2) | 10 (4.4) |  |
| Grade 1 | 537 (57.2) | 589 (52.7) | 409 (44.9) | 197 (38.0) | 79 (35.0) |  |
| Grade 2 | 186 (19.8) | 277 (24.8) | 316 (34.7) | 193 (37.2) | 77 (34.1) |  |
| Grade 3 | 48 (5.1) | 97 (8.7) | 93 (10.2) | 98 (18.9) | 50 (22.1) |  |
| Grade 4 |  |  |  |  |  |  |

Abbreviation: COPD, chronic obstructive pulmonary disease; SD, standard deviation; CAT, COPD assessment test; mMRC, Modified Medical Research Council Dyspnea Scale; STAR, Staging of Airflow obstruction by Ratio.

STable 7. Symptoms of participants according to GOLD.

|  | GOLD 0 | GOLD 1 | GOLD 2 | GOLD 3 | GOLD 4 | p-value |
| --- | --- | --- | --- | --- | --- | --- |
| All population | | | | | | |
| Follow up CAT total score (mean (SD)) | 13.80 (6.90) | 11.63 (7.65) | 13.09 (7.63) | 15.90 (7.04) | 18.28 (7.11) | <0.001 |
| Follow up CAT score (%) |  |  |  |  |  | <0.001 |
| 0-9 | 443 (27.6) | 222 (43.0) | 755 (34.7) | 413 (17.4) | 116 (9.2) |  |
| 10-19 | 839 (52.3) | 213 (41.3) | 1043 (47.9) | 1314 (55.5) | 711 (56.4) |  |
| 20-29 | 289 (18.0) | 67 (13.0) | 272 (12.5) | 500 (21.1) | 298 (23.7) |  |
| 30-40 | 32 (2.0) | 14 (2.7) | 106 (4.9) | 142 (6.0) | 135 (10.7) |  |
| Follow up mMRC (mean (SD)) | 1.19 (0.79) | 1.09 (0.75) | 1.28 (0.79) | 1.59 (0.81) | 1.80 (0.85) | <0.001 |
| Follow up mMRC (%) |  |  |  |  |  | <0.001 |
| Grade 0 | 264 (16.5) | 98 (19.0) | 300 (13.8) | 119 (5.0) | 36 (2.9) |  |
| Grade 1 | 882 (55.0) | 295 (57.2) | 1118 (51.4) | 1080 (45.6) | 468 (37.1) |  |
| Grade 2 | 360 (22.5) | 101 (19.6) | 613 (28.2) | 828 (35.0) | 490 (38.9) |  |
| Grade 3 | 89 (5.6) | 21 (4.1) | 141 (6.5) | 331 (14.0) | 240 (19.0) |  |
| Grade 4 | 8 (0.5) | 1 (0.2) | 4 (0.2) | 11 (0.5) | 26 (2.1) |  |
|  | | | | | | |
| Smokers | | | | | | |
| Follow up CAT total score (mean (SD)) | 14.14 (7.14) | 11.15 (8.11) | 13.29 (8.04) | 16.14 (7.25) | 18.32 (6.99) | <0.001 |
| Follow up CAT score (%) |  |  |  |  |  | <0.001 |
| 0-9 | 165 (24.8) | 118 (48.6) | 382 (36.0) | 237 (17.1) | 78 (9.1) |  |
| 10-19 | 365 (54.9) | 87 (35.8) | 478 (45.0) | 771 (55.7) | 489 (56.9) |  |
| 20-29 | 115 (17.3) | 30 (12.3) | 132 (12.4) | 269 (19.5) | 204 (23.7) |  |
| 30-40 | 20 (3.0) | 8 (3.3) | 70 (6.6) | 106 (7.7) | 89 (10.3) |  |
| Follow up mMRC (mean (SD)) | 1.26 (0.81) | 1.04 (0.72) | 1.29 (0.79) | 1.55 (0.79) | 1.77 (0.80) | <0.001 |
| Follow up mMRC (%) |  |  |  |  |  | <0.001 |
| Grade 0 | 100 (15.0) | 51 (21.0) | 144 (13.6) | 66 (4.8) | 16 (1.9) |  |
| Grade 1 | 345 (51.9) | 138 (56.8) | 542 (51.0) | 670 (48.4) | 337 (39.2) |  |
| Grade 2 | 174 (26.2) | 47 (19.3) | 305 (28.7) | 468 (33.8) | 349 (40.6) |  |
| Grade 3 | 41 (6.2) | 7 (2.9) | 69 (6.5) | 173 (12.5) | 146 (17.0) |  |
| Grade 4 | 5 (0.8) | 0 (0.0) | 2 (0.2) | 6 (0.4) | 12 (1.4) |  |
|  | | | | | | |
| Non-smokers | | | | | | |
| Follow up CAT total score (mean (SD)) | 13.57 (6.71) | 12.05 (7.21) | 12.90 (7.21) | 15.56 (6.72) | 18.20 (7.36) | <0.001 |
| Follow up CAT score (%) |  |  |  |  |  | <0.001 |
| 0-9 | 278 (29.6) | 104 (38.1) | 373 (33.5) | 176 (17.8) | 38 (9.5) |  |
| 10-19 | 474 (50.5) | 126 (46.2) | 565 (50.7) | 543 (55.1) | 222 (55.5) |  |
| 20-29 | 174 (18.6) | 37 (13.6) | 140 (12.6) | 231 (23.4) | 94 (23.5) |  |
| 30-40 | 12 (1.3) | 6 (2.2) | 36 (3.2) | 36 (3.7) | 46 (11.5) |  |
| Follow up mMRC (mean (SD)) | 1.14 (0.77) | 1.14 (0.77) | 1.27 (0.79) | 1.65 (0.83) | 1.88 (0.94) | <0.001 |
| Follow up mMRC (%) |  |  |  |  |  | <0.001 |
| Grade 0 | 164 (17.5) | 47 (17.2) | 156 (14.0) | 53 (5.4) | 20 (5.0) |  |
| Grade 1 | 537 (57.2) | 157 (57.5) | 576 (51.7) | 410 (41.6) | 131 (32.8) |  |
| Grade 2 | 186 (19.8) | 54 (19.8) | 308 (27.6) | 360 (36.5) | 141 (35.2) |  |
| Grade 3 | 48 (5.1) | 14 (5.1) | 72 (6.5) | 158 (16.0) | 94 (23.5) |  |
| Grade 4 | 3 (0.3) | 1 (0.4) | 2 (0.2) | 5 (0.5) | 14 (3.5) |  |

Abbreviation: COPD, chronic obstructive pulmonary disease; SD, standard deviation; CAT, COPD assessment test; mMRC, Modified Medical Research Council Dyspnea Scale; STAR, Staging of Airflow obstruction by Ratio.

STable 8. Comparison of CAT score by severity stage in COPD patients.

| stage | star | | gold | |
| --- | --- | --- | --- | --- |
| unadjusted | adjusted | unadjusted | adjusted |
| All population | | | | |
| I | ref | ref | ref | ref |
| II | 1.66 (1.22, 2.10) | 1.42 (0.98, 1.86) | 1.15 (0.76, 2.16) | 1.44 (0.75, 2.14) |
| III | 2.35 (1.84, 2.86) | 2.06 (1.56, 2.57) | 4.27 (3.58, 4.97) | 4.04 (3.34, 4.73) |
| IV | 3.88 (3.20, 4.56) | 3.64 (2.96, 4.31) | 6.66 (5.91, 7.41) | 6.51 (5.77, 7.26) |
| Smokers | | | | |
| I | ref | ref | ref | ref |
| II | 1.49 (0.87, 2.11) | 1.27 (0.65, 1.88) | 2.14 (1.10, 3.19) | 2.00 (0.97, 3.03) |
| III | 1.92 (1.22, 2.62) | 1.69 (1.00, 2.38) | 4.99 (3.97, 6.02) | 4.63 (3.62, 5.64) |
| IV | 3.31 (2.39, 4.22) | 3.13 (2.22, 4.03) | 7.17 (6.11, 8.24) | 6.98 (5.92, 8.04) |
| Non-smokers | | | | |
| I | ref | ref | ref | ref |
| II | 1.77 (1.14, 2.40) | 1.54 (0.92, 2.16) | 0.85 (-0.09, 1.78) | 0.94 (0.02, 1.86) |
| III | 2.78 (2.03, 3.53) | 2.34 (1.59, 3.09) | 3.51 (2.56, 4.46) | 3.39 (2.46, 4.33) |
| IV | 4.52 (3.49, 5.55) | 4.17 (3.15, 5.19) | 6.15 (5.06, 7.24) | 6.12 (5.04, 7.20) |

CAT, COPD assessment test.

Adjusted model: model adjusted for age, sex, and height; CAT, COPD assessment test

STable 9. Comparison of mMRC by severity stage in COPD patients.

| stage | star | | gold | |
| --- | --- | --- | --- | --- |
| unadjusted | adjusted | unadjusted | adjusted |
| All population | | | | |
| I | ref | ref | ref | ref |
| II | 0.15 (0.10, 0.20) | 0.13 (0.08, 0.17) | 0.19 (0.11, 0.26) | 0.19 (0.12, 0.27) |
| III | 0.34 (0.28, 0.39) | 0.31 (0.26, 0.37) | 0.50 (0.42, 0.58) | 0.49 (0.41, 0.57) |
| IV | 0.57 (0.49, 0.64) | 0.55 (0.48, 0.63) | 0.71 (0.63, 0.79) | 0.73 (0.64, 0.81) |
| Smokers | | | | |
| I | ref | ref | ref | ref |
| II | 0.13 (0.07, 0.20) | 0.11 (0.04, 0.17) | 0.25 (0.14, 0.36) | 0.23 (0.12, 0.34) |
| III | 0.27 (0.20, 0.35) | 0.25 (0.18, 0.32) | 0.51 (0.41, 0.62) | 0.47 (0.36, 0.57) |
| IV | 0.56 (0.46, 0.65) | 0.54 (0.45, 0.63) | 0.73 (0.62, 0.84) | 0.70 (0.59, 0.81) |
| Non-smokers | | | | |
| I | ref | ref | ref | ref |
| II | 0.17 (0.10, 0.25) | 0.15 (0.07, 0.22) | 0.13 (0.02, 0.24) | 0.17 (0.06, 0.27) |
| III | 0.42 (0.34, 0.51) | 0.40 (0.31, 0.48) | 0.51 (0.40, 0.62) | 0.52 (0.41, 0.63) |
| IV | 0.58 (0.46, 0.70) | 0.55 (0.44, 0.67) | 0.74 (0.61, 0.87) | 0.79 (0.66, 0.91) |

Abbreviation: GOLD, Chronic Obstructive Lung Disease; STAR, Staging of Airflow obstruction by Ratio; ref, reference; mMRC, Modified Medical Research Council Dyspnea Scale.

Adjusted model: model adjusted for age, sex, and height.

STable 10. Comparison of CAT score by severity stage in all high-risk population.

| stage | star | | gold | |
| --- | --- | --- | --- | --- |
| unadjusted | adjusted | unadjusted | adjusted |
| All population | | | | |
| 0 | ref | ref | ref | ref |
| I | -0.14 (-0.61, 0.34) | -0.23 (-0.70, 0.23) | -2.18 (-2.89, -1.46) | -2.29 (-3.00, -1.59) |
| II | 1.53 (1.05, 2.01) | 1.17 (0.69, 1.64) | -0.72 (-1.18, -0.25) | -0.84 (-1.30, -0.38) |
| III | 2.22 (1.68, 2.76) | 1.83 (1.29, 2.36) | 2.10 (1.64, 2.56) | 1.73 (1.28, 2.19) |
| IV | 3.74 (3.04, 4.45) | 3.40 (2.71, 4.10) | 4.48 (3.95, 5.01) | 4.24 (3.71, 4.77) |
| Smokers | | | | |
| 0 | ref | ref | ref | ref |
| I | 0.09 (-0.63, 0.81) | 0.11 (-0.60, 0.82) | -2.99 (-4.08, -1.90) | -2.83 (-3.90, -1.75) |
| II | 1.58 (0.85, 2.30) | 1.35 (0.63, 2.06) | -0.85 (-1.57, -0.13) | -0.87 (-1.58, -0.16) |
| III | 2.01 (1.22, 2.80) | 1.78 (1.00, 2.56) | 2.01 (1.32, 2.69) | 1.73 (1.05, 2.41) |
| IV | 3.39 (2.41, 4.38) | 3.22 (2.25, 4.19) | 4.19 (3.43, 4.94) | 4.08 (3.34, 4.82) |
| Non-smokers | | | | |
| 0 | ref | ref | ref | ref |
| I | -0.51 (-1.12, 0.11) | -0.56 (-1.17, 0.04) | -1.51 (-2.46, -0.57) | -1.82 (-2.75, -0.89) |
| II | 1.26 (0.61, 1.91) | 0.96 (0.32, 1.60) | -0.67 (-1.28, -0.06) | -0.83 (-1.42, -0.23) |
| III | 2.27 (1.51, 3.03) | 1.81 (1.06, 2.56) | 2.00 (1.37, 2.62) | 1.63 (1.01, 2.24) |
| IV | 4.01 (2.98, 5.04) | 3.64 (2.63, 4.65) | 4.64 (3.82, 5.45) | 4.41 (3.61, 5.21) |

Abbreviation: GOLD, Chronic Obstructive Lung Disease; STAR, Staging of Airflow obstruction by Ratio; ref, reference; CAT, COPD assessment test.

Adjusted model: model adjusted for age, sex, and height.

STable 11. Comparison of mMRC by severity stage in all high-risk population.

| stage | star | | gold | |
| --- | --- | --- | --- | --- |
| unadjusted | adjusted | unadjusted | adjusted |
| All population | | | | |
| 0 | ref | ref | ref | ref |
| I | 0.13 (0.08, 0.18) | 0.12 (0.07, 0.17) | -0.09 (-0.17, -0.01) | -0.11 (-0.19, -0.04) |
| II | 0.28 (0.23, 0.33) | 0.25 (0.19, 0.30) | 0.09 (0.04, 0.15) | 0.08 (0.03, 0.13) |
| III | 0.47 (0.41, 0.52) | 0.44 (0.38, 0.49) | 0.41 (0.36, 0.46) | 0.37 (0.32, 0.43) |
| IV | 0.70 (0.62, 0.77) | 0.67 (0.60, 0.75) | 0.62 (0.56, 0.68) | 0.61 (0.55, 0.67) |
| Smokers | | | | |
| 0 | ref | ref | ref | ref |
| I | 0.07 (0.00, 0.15) | 0.07 (0.00, 0.15) | -0.22 (-0.33, -0.10) | -0.20 (-0.31, -0.09) |
| II | 0.21 (0.13, 0.28) | 0.18 (0.11, 0.26) | 0.03 (-0.05, 0.11) | 0.03 (-0.05, 0.10) |
| III | 0.35 (0.26, 0.43) | 0.32 (0.24, 0.40) | 0.30 (0.22, 0.37) | 0.27 (0.19, 0.34) |
| IV | 0.63 (0.53, 0.74) | 0.61 (0.51, 0.72) | 0.51 (0.43, 0.59) | 0.50 (0.42, 0.58) |
| Non-smokers | | | | |
| 0 | ref | ref | ref | ref |
| I | 0.16 (0.09, 0.23) | 0.15 (0.08, 0.22) | 0.00 (-0.11, 0.11) | -0.05 (-0.16, 0.06) |
| II | 0.33 (0.26, 0.41) | 0.29 (0.22, 0.37) | 0.14 (0.07, 0.21) | 0.11 (0.04, 0.18) |
| III | 0.59 (0.50, 0.67) | 0.55 (0.46, 0.63) | 0.51 (0.44, 0.58) | 0.47 (0.40, 0.54) |
| IV | 0.74 (0.62, 0.86) | 0.70 (0.59, 0.82) | 0.74 (0.65, 0.84) | 0.73 (0.64, 0.83) |

Abbreviation: GOLD, Chronic Obstructive Lung Disease; STAR, Staging of Airflow obstruction by Ratio; ref, reference; mMRC, Modified Medical Research Council Dyspnea Scale.

Adjusted model: model adjusted for age, sex, and height.
